# Supplementary material
Source: ML conference proceedings conference paper supplement (https://proceedings.mlr.press/v37/gala15.html)
Supplement: Supplementary file [file gala15-supp.pdf]

---

# Latent Gaussian Processes for Distribution Estimation of Multivariate Categorical Data – Appendix

---

## A Appendix

### A.1 Code

The basic model and inference (without covariance matrix caching) can be implemented in 20 lines of Python and Theano for each categorical variable:

```
1 import theano.tensor as T
2 m = T.dmatrix('m') # ..and other variables
3 X = m + s * randn(N, Q)
4 U = mu + L.dot(randn(M, K))
5 Kmm = RBF(sf2, l, Z)
6 Kmn = RBF(sf2, l, Z, X)
7 Knn = RBFnn(sf2, l, X)
8 KmmInv = T.matrix_inverse(Kmm)
9 A = KmmInv.dot(Kmn)
10 B = Knn - T.sum(Kmn * KmmInv.dot(Kmn), 0)
11 F = A.T.dot(U)+B[:,None]**0.5 * randn(N,K)
12 S = T.nnet.softmax(F)
13 KL_U, KL_X = get_KL_U(), get_KL_X()
14 LS = T.sum(T.log(T.sum(Y * S, 1)))
15         - KL_U - KL_X
16 LS_func = theano.function(['inputs'],
17                             LS)
18 dLS_dm = theano.function(['inputs'],
19                             T.grad(LS, m)) # and others
20 # ... and optimise LS with RMS-PROP
```
